# Supplementary material for: MiR-145 functions as a tumor suppressor in Papillary Thyroid Cancer by inhibiting RAB5C
Source: PubMed Central journal article supplement (PMC7415399; doi:10.7150/ijms.44723), 2020-07-25
Supplement: ijmsv17p1992s1.pdf [file ijmsv17p1992s1.pdf]

**Supplementary Table 1. Information of PTC patients**

| <b>No.</b> | <b>gender</b> | <b>age</b> | <b>tumor size</b> | <b>Extrathyroidal invasion</b> | <b>Multicentricity</b> | <b>Cervical metastasis status</b> |
|------------|---------------|------------|-------------------|--------------------------------|------------------------|-----------------------------------|
| 1          | female        | 41         | 1.8               | -                              | -                      | NO                                |
| 2          | female        | 33         | 1.6               | -                              | -                      | NO                                |
| 3          | male          | 55         | 3.2               | +                              | +                      | N1a                               |
| 4          | female        | 40         | 1.1               | -                              | -                      | NO                                |
| 5          | female        | 65         | 4.1               | +                              | +                      | N1a                               |
| 6          | female        | 29         | 1.9               | -                              | -                      | NO                                |
| 7          | female        | 44         | 1.8               | -                              | -                      | NO                                |
| 8          | female        | 40         | 1.8               | -                              | -                      | NO                                |
| 9          | male          | 58         | 2.3               | -                              | -                      | NO                                |
| 10         | male          | 46         | 1.5               | -                              | -                      | NO                                |
| 11         | female        | 56         | 3.6               | +                              | +                      | N1b                               |
| 12         | female        | 63         | 2.8               | -                              | -                      | NO                                |
| 13         | female        | 37         | 1.7               | -                              | -                      | NO                                |
| 14         | female        | 69         | 3.7               | +                              | +                      | N1a                               |
| 15         | female        | 43         | 1.9               | -                              | -                      | NO                                |
| 16         | female        | 40         | 1.6               | -                              | -                      | NO                                |
| 17         | female        | 75         | 3                 | -                              | +                      | N1a                               |
| 18         | female        | 41         | 1.8               | -                              | -                      | NO                                |
| 19         | male          | 64         | 2.6               | -                              | -                      | N1a                               |
| 20         | male          | 42         | 1.9               | -                              | -                      | NO                                |
| 21         | female        | 58         | 3.3               | -                              | +                      | N1b                               |
| 22         | male          | 48         | 1.5               | -                              | +                      | N1a                               |
| 23         | female        | 39         | 1                 | -                              | -                      | NO                                |
| 24         | female        | 36         | 1.2               | -                              | -                      | NO                                |
| 25         | male          | 71         | 4.5               | +                              | +                      | N1a                               |
| 26         | female        | 80         | 4.6               | +                              | -                      | N1a                               |
| 27         | female        | 64         | 1.8               | -                              | -                      | NO                                |
| 28         | female        | 42         | 1                 | -                              | -                      | N1a                               |
| 29         | female        | 51         | 1.6               | -                              | -                      | NO                                |
| 30         | male          | 69         | 5.6               | +                              | +                      | N1a                               |
| 31         | female        | 32         | 1.1               | -                              | -                      | NO                                |
| 32         | male          | 63         | 6                 | +                              | -                      | N1b                               |
| 33         | female        | 47         | 1                 | -                              | -                      | NO                                |
| 34         | female        | 69         | 4.4               | +                              | +                      | N1b                               |
| 35         | female        | 35         | 1.9               | -                              | -                      | NO                                |
| 36         | female        | 77         | 2.4               | -                              | -                      | N1a                               |
| 37         | female        | 41         | 1.5               | -                              | -                      | NO                                |
| 38         | female        | 74         | 1.2               | -                              | +                      | NO                                |
| 39         | male          | 49         | 1.8               | -                              | -                      | NO                                |
| 40         | female        | 68         | 2.6               | -                              | +                      | N1a                               |

|    |        |    |     |   |   |     |
|----|--------|----|-----|---|---|-----|
| 41 | female | 43 | 1.8 | - | - | NO  |
| 42 | female | 71 | 2.8 | - | - | NO  |
| 43 | female | 42 | 1   | - | - | NO  |
| 44 | male   | 59 | 3.5 | - | + | N1a |
| 45 | female | 63 | 5.1 | + | + | N1b |
| 46 | female | 40 | 1.5 | - | - | NO  |
| 47 | male   | 75 | 2.2 | - | - | NO  |
| 48 | female | 66 | 2.9 | - | - | N1a |
| 49 | male   | 42 | 1.4 | - | + | NO  |
| 50 | female | 74 | 0.9 | - | - | N1a |
| 51 | male   | 60 | 5.5 | + | + | N1b |
| 52 | female | 41 | 1.8 | - | - | NO  |
| 53 | female | 57 | 2.4 | - | - | NO  |
| 54 | female | 38 | 1.9 | - | - | NO  |
| 55 | female | 61 | 4.1 | + | - | N1a |
| 56 | female | 44 | 1.6 | - | + | NO  |
| 57 | female | 76 | 3.9 | + | + | N1b |
